# Supplementary material
Source: PubMed Central journal article supplement (PMC4989196)

English CNV1

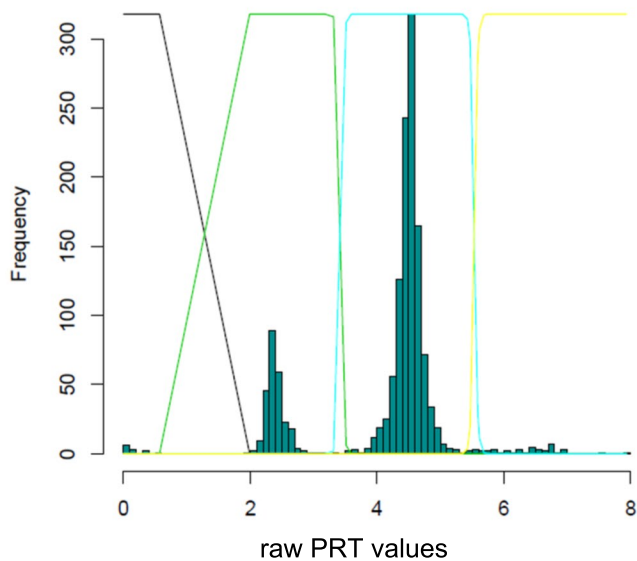

English CNV2

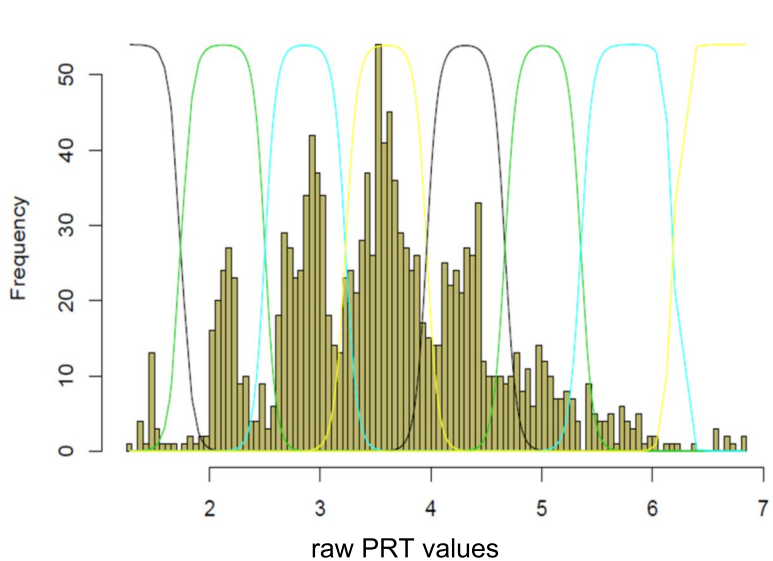

Scottish CNV1

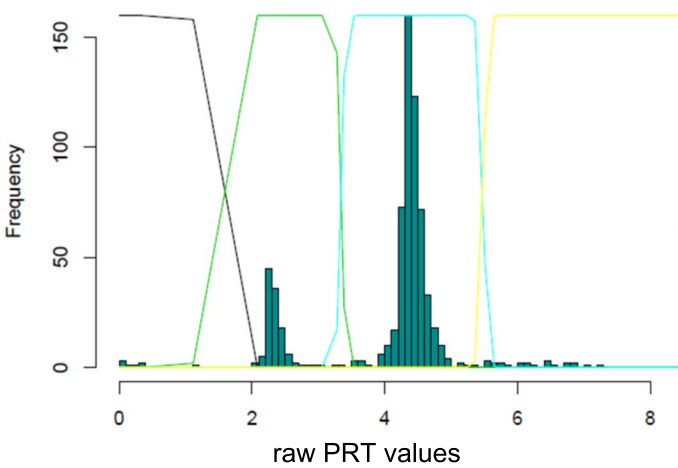

Scottish CNV2

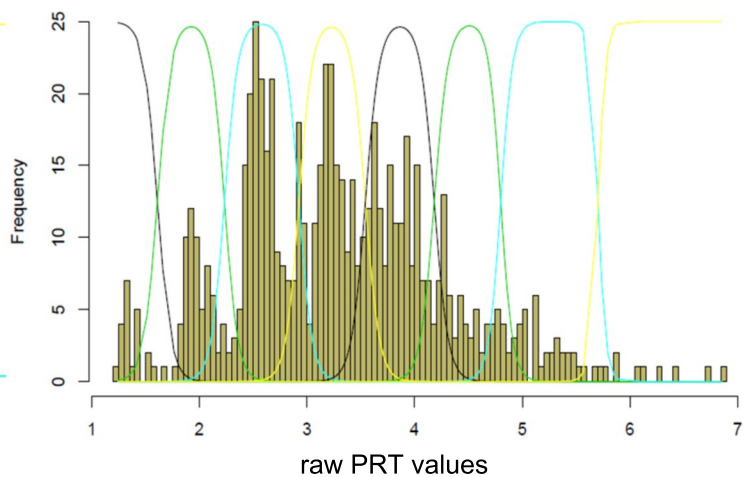

Danish CNV1

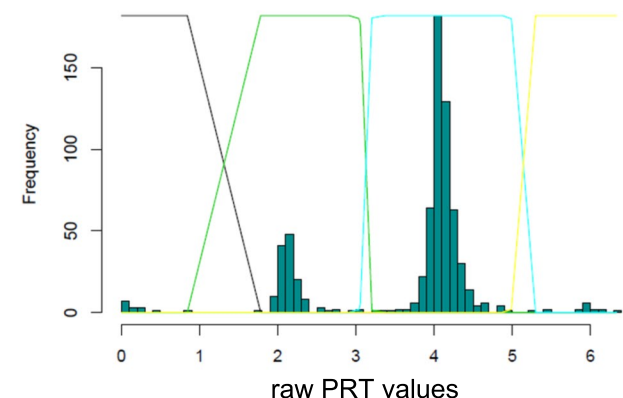

Danish CNV2

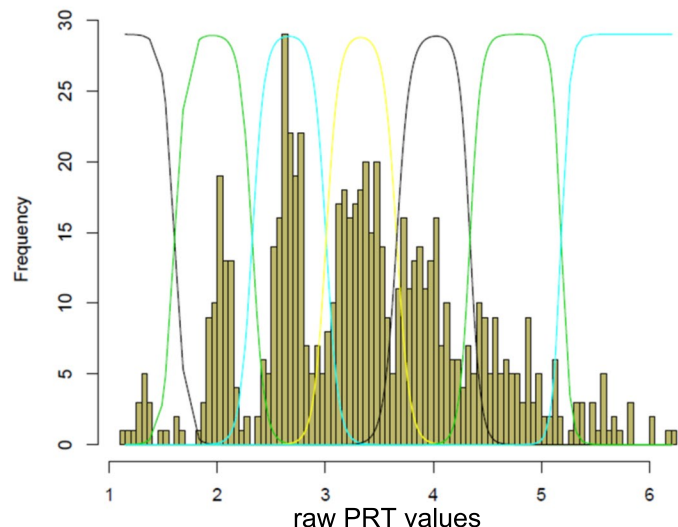

Supplement: ejhg2015280x2.pdf [file ejhg2015280x2.pdf]
