# Supplementary material
Source: PubMed Central journal article supplement (PMC4989196)

Crohn's disease cases

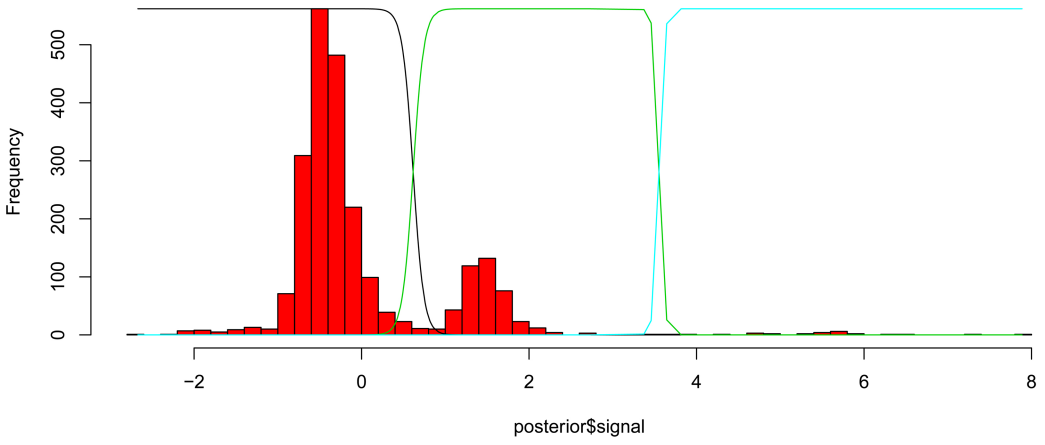

1958 cohort controls

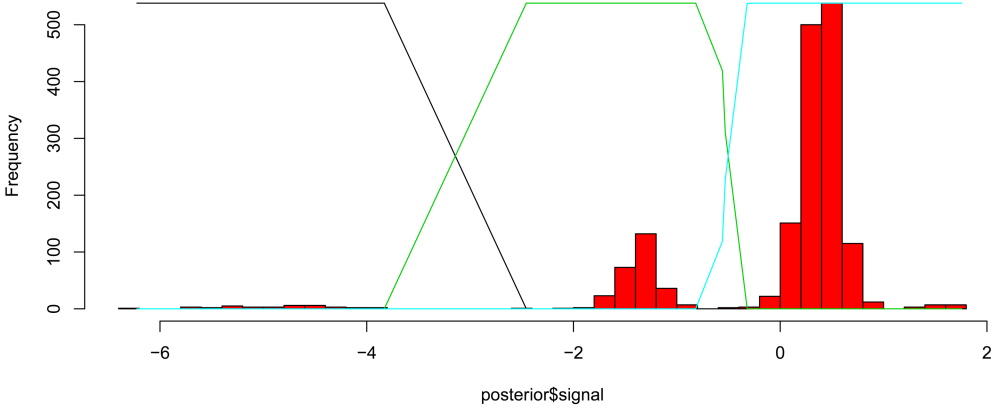

NBS controls

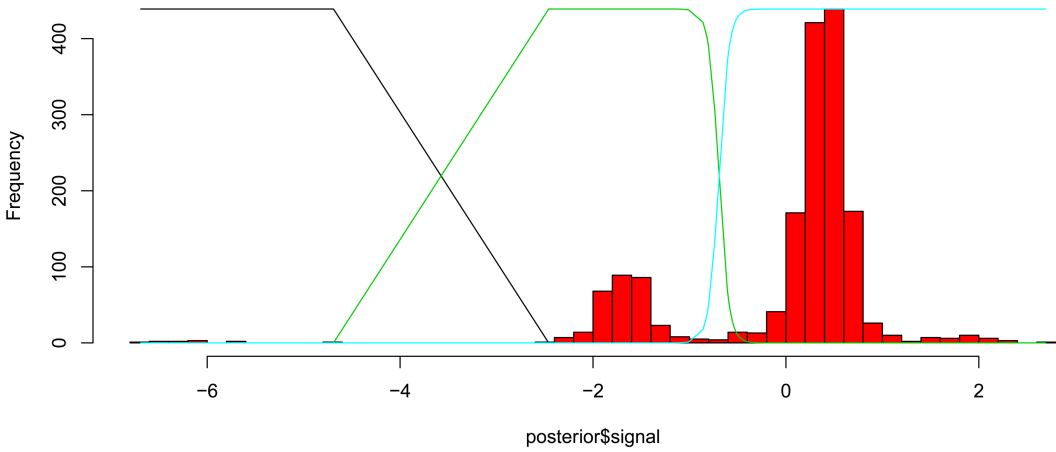

Supplement: ejhg2015280x3.pdf [file ejhg2015280x3.pdf]
